# Supplementary material for: Molecular design and synthesis of bithiophene copolymers for advanced nonlinear optical response
Source: Royal Society of Chemistry journal article supplement (doi:10.1039/d5ra06096f), 2026-01-01
Supplement: d5ra06096f1.pdf [file d5ra06096f1.pdf]

## Supporting information

For

# Molecular Design and Synthesis of Bithiophene Copolymers for Advanced Nonlinear Optical Response

Sowmya Dean,<sup>a</sup> Badriyah Alhalaili,<sup>a</sup> Gisa Grace Ninan<sup>b</sup> and K. Sreekumar<sup>c\*</sup>

<sup>a</sup> Nanotechnology Application Program, Energy and Building Research Centre, Kuwait Institute for Scientific Research, Safat 13109, Kuwait; [sdean@kisir.edu.kw](mailto:sdean@kisir.edu.kw)

<sup>b</sup> St. Francis de Sales College (Autonomous), Electronics City, Bengaluru, 560100

<sup>c</sup> Cochin University of Science and Technology, Department of Applied Chemistry Kochi-22, Kerala, India; [kskpolymer.cusat@gmail.com](mailto:kskpolymer.cusat@gmail.com)

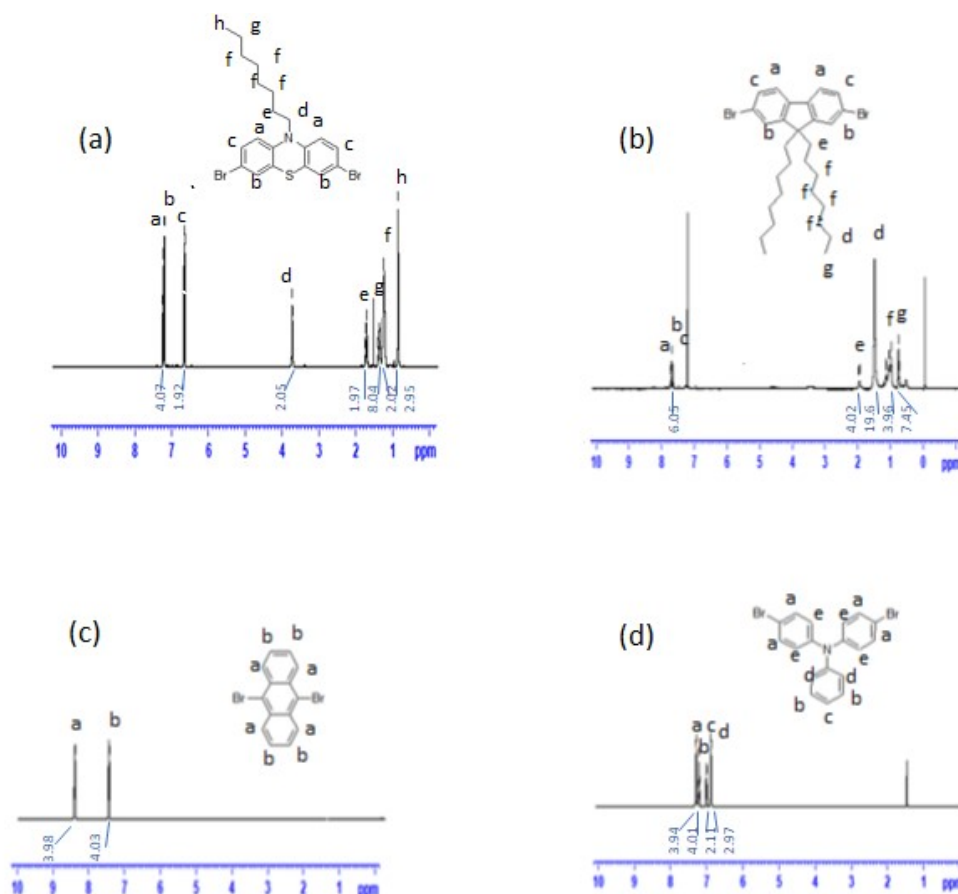

**Fig. S1.** <sup>1</sup>H NMR spectra of monomers (a) 3,7-dibromo-10-octylphenothiazine (PH), (b) 2,7-dibromo-9,9-dioctyl-9H-fluorene (FLN), (c) 9,10-dibromoanthracene (ANT) and (d) 4,4'-dibromotriphenylamine (TPA)

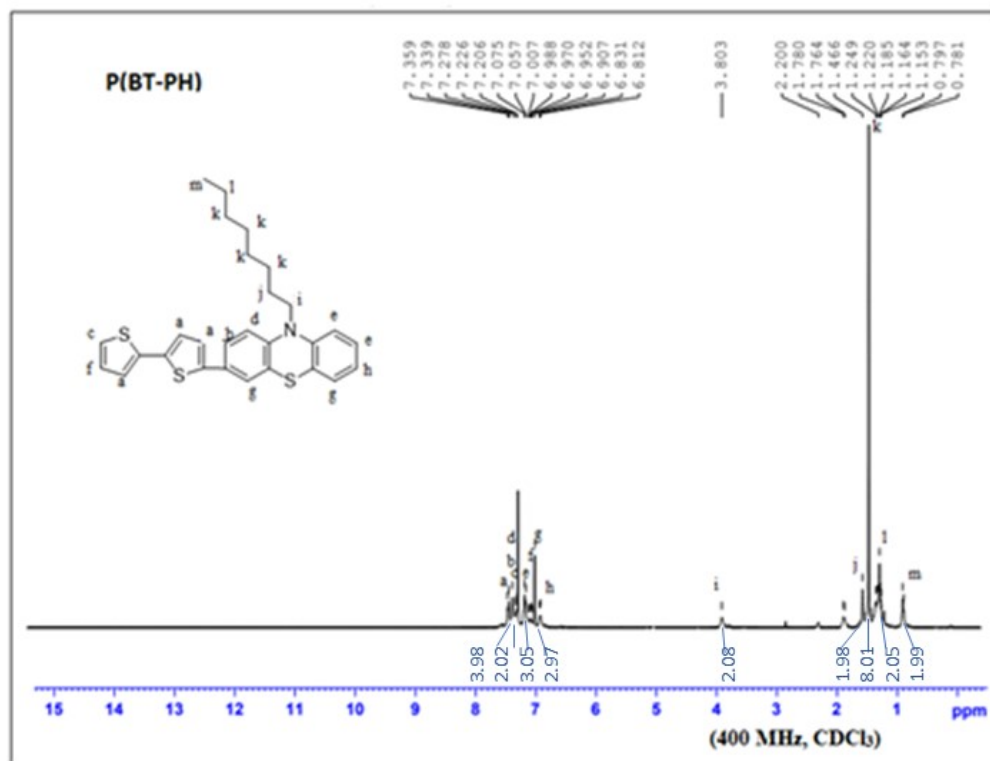

**Fig. S2.**  $^1\text{H}$  NMR spectra of P(BT-PH)

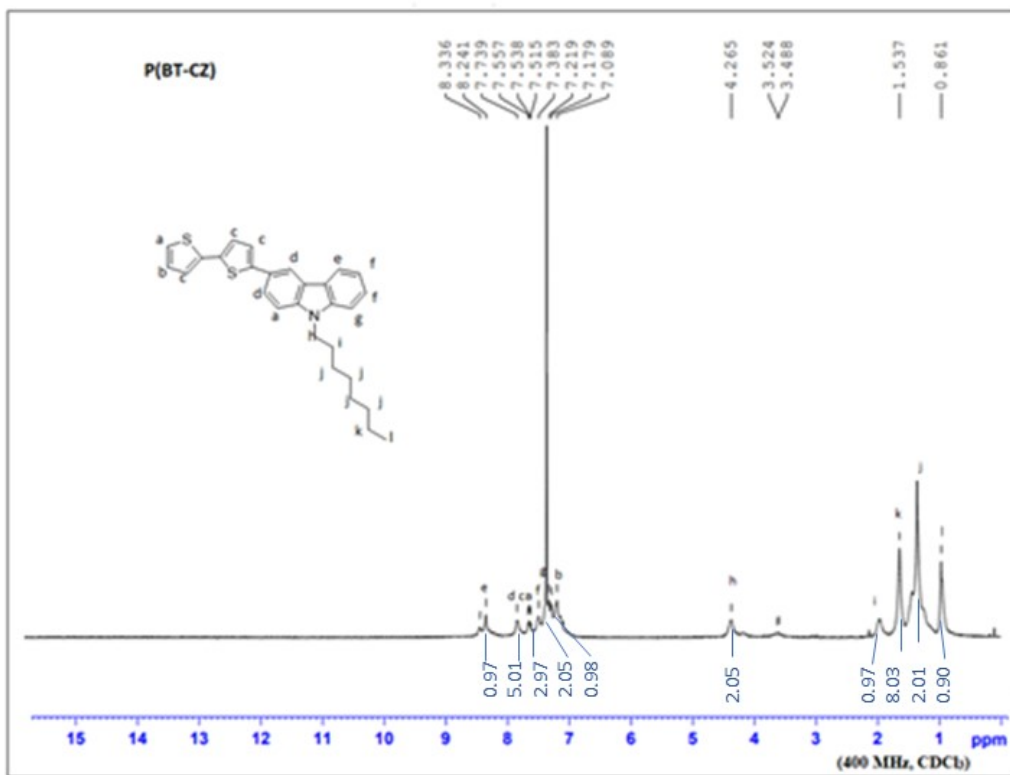

**Fig. S3.**  $^1\text{H}$  NMR spectra of P(BT-CZ)

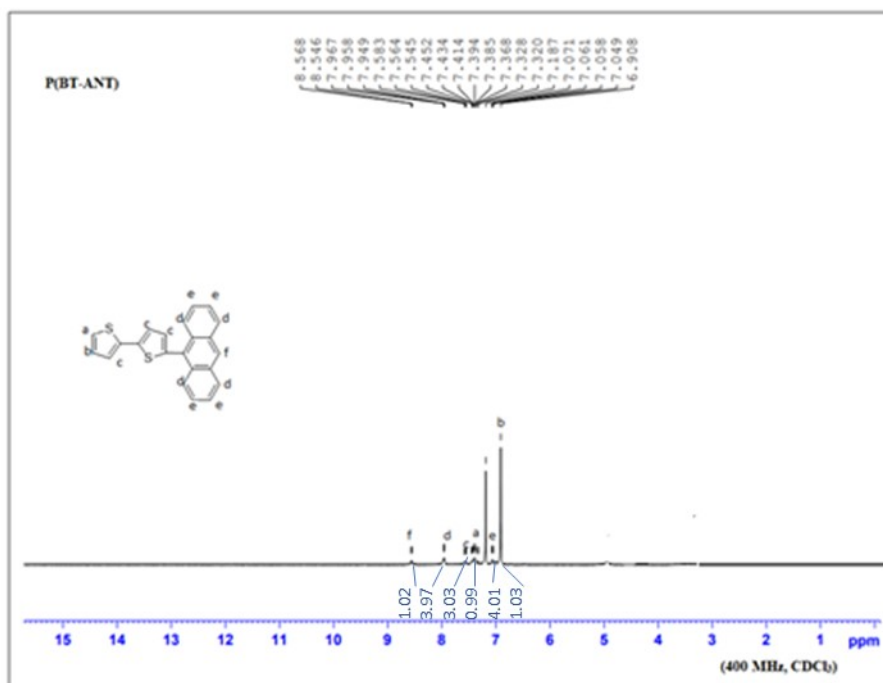

**Fig. S4.**  $^1\text{H}$  NMR spectra of P(BT-ANT)

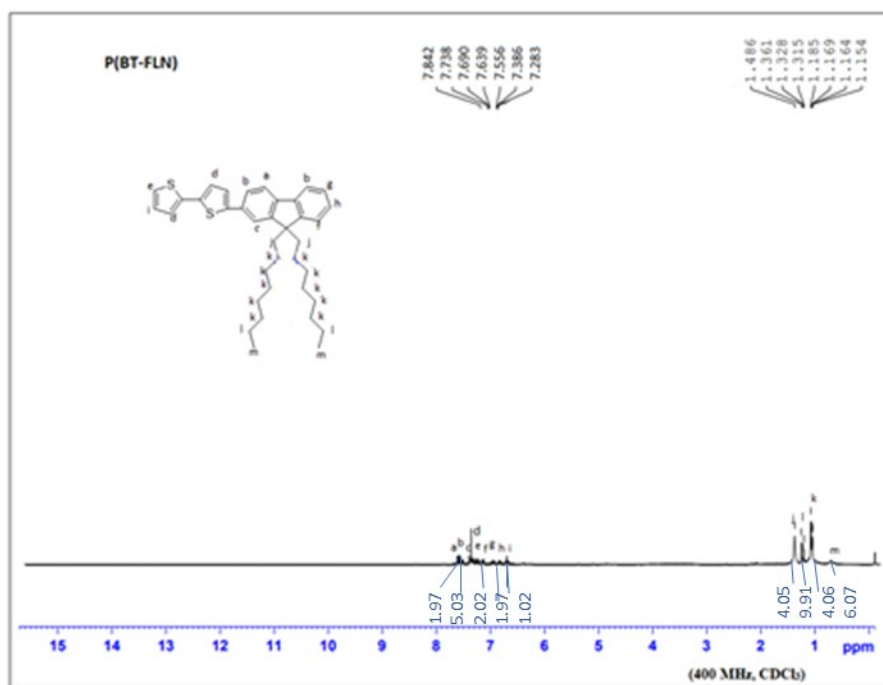

**Fig. S5.**  $^1\text{H}$  NMR spectra of P(BT-FLN)

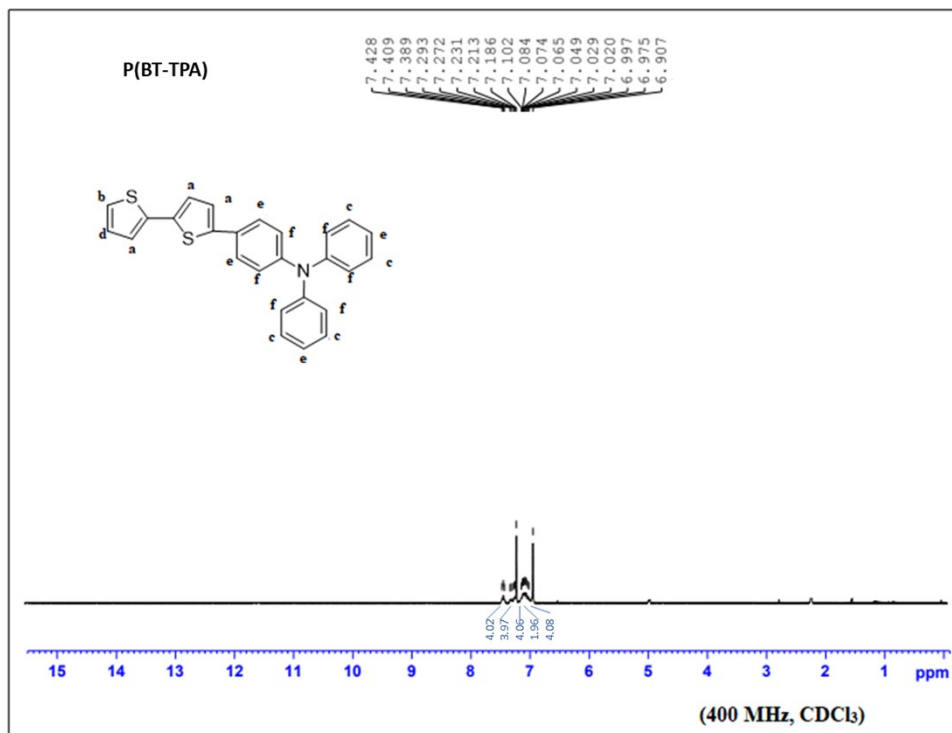

Fig. S6. <sup>1</sup>H NMR spectra of P(BT-TPA)

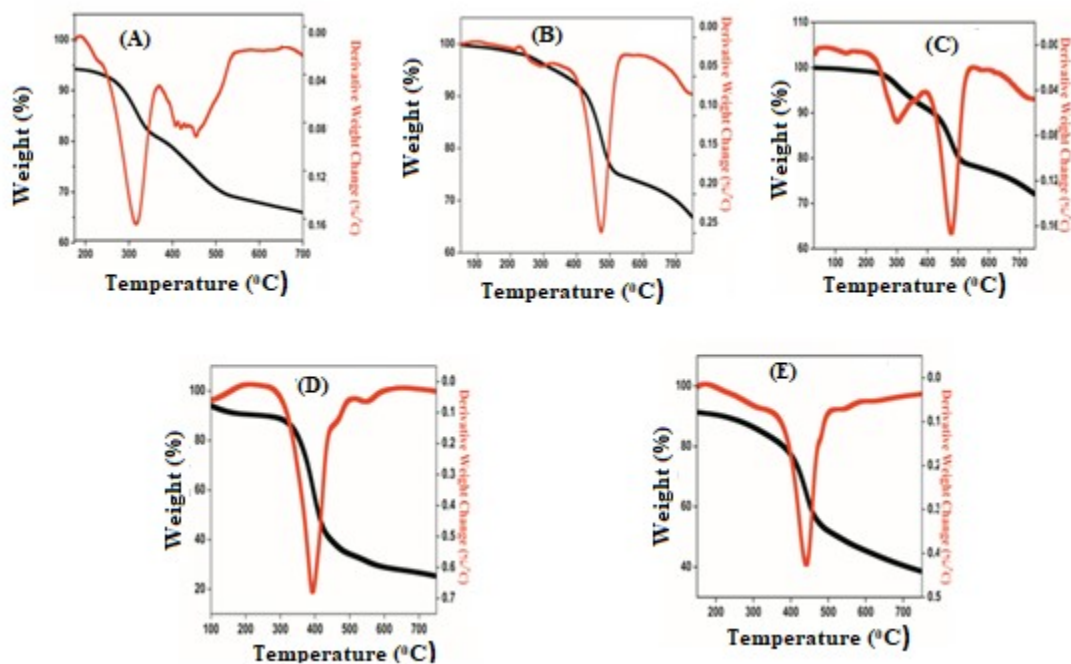

Fig. S7: TG-DTG traces of the copolymers P(BT-PH), P(BT-CZ), P(BT-FLN), P(BT-ANT) and P(BT-TPA)
